# Supplementary material for: Enhancing the thermal stability of the carbon-based perovskite solar cells by using a CsxFA1−xPbBrxI3−x light absorber
Source: Royal Society of Chemistry journal article supplement (doi:10.1039/c9ra00043g), 2019-01-01
Supplement: c9ra00043g1.pdf [file c9ra00043g1.pdf]

## Supplemental information

Table S1 Photovoltaic parameters of the carbon-based PSCs with different Br content.

| Device | $V_{oc}$ (mV) | $J_{sc}$ ( $\text{mA cm}^{-2}$ ) | FF (%) | PCE (%) |
|--------|---------------|----------------------------------|--------|---------|
| 5%Br   | 942           | 20.69                            | 0.552  | 10.75   |
| 10%Br  | 958           | 20.29                            | 0.593  | 11.53   |
| 15%Br  | 937           | 19.85                            | 0.523  | 9.73    |

Table S2 Photovoltaic parameters of the carbon-based PSCs with different Cs content.

| Device | $V_{oc}$ (mV) | $J_{sc}$ ( $\text{mA cm}^{-2}$ ) | FF (%) | PCE (%) |
|--------|---------------|----------------------------------|--------|---------|
| 5%Cs   | 954           | 20.12                            | 0.576  | 11.05   |
| 10%Cs  | 970           | 20.91                            | 0.578  | 11.72   |
| 15%Cs  | 978           | 21.48                            | 0.53   | 11.14   |

Table S3 The detailed fitting parameters of the FAPbI<sub>3</sub>-based perovskite.

| Lifetime     | pure   | 10%Br  | 10%Cs  | 10%Br-Cs |
|--------------|--------|--------|--------|----------|
| $\tau$ 1(ns) | 31.67  | 42.74  | 46.79  | 17.87    |
| $\tau$ 2(ns) | 212.12 | 322.44 | 402.82 | 524.58   |

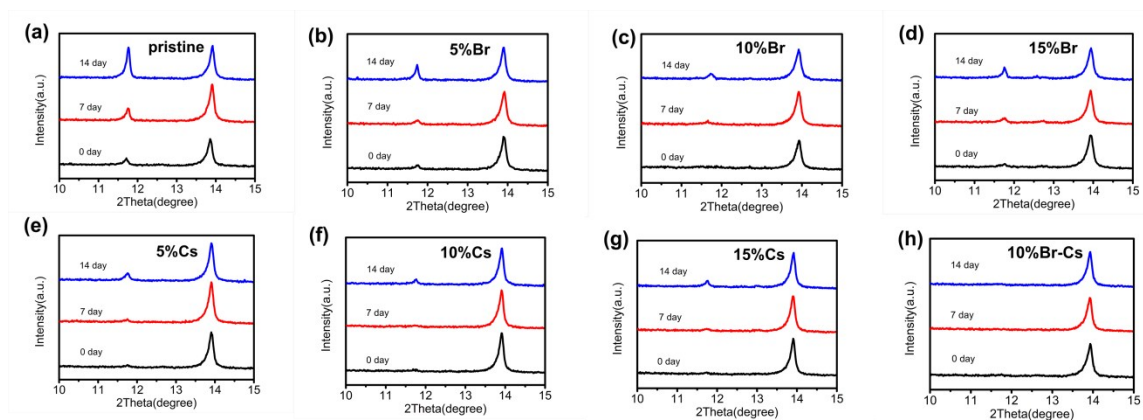

Fig. S1 The XRD patterns of the PSCs stored after 14 days.

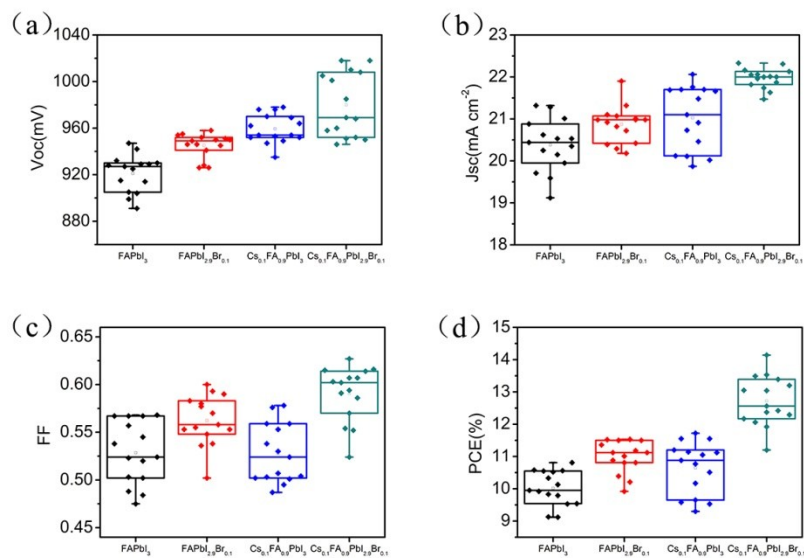

Figure S2 The statistic J-V parameters of the FAPbI<sub>3</sub>-based PSCs.

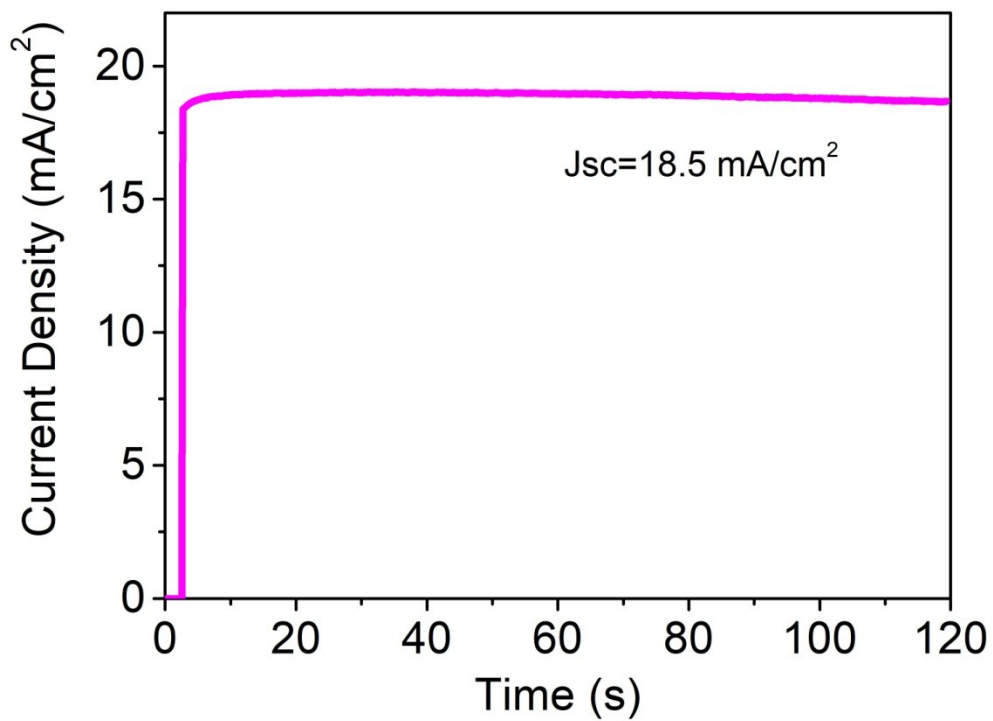

Fig. S3 The steady current output of the champion cell at  $V_{max}$  of 0.75 V.

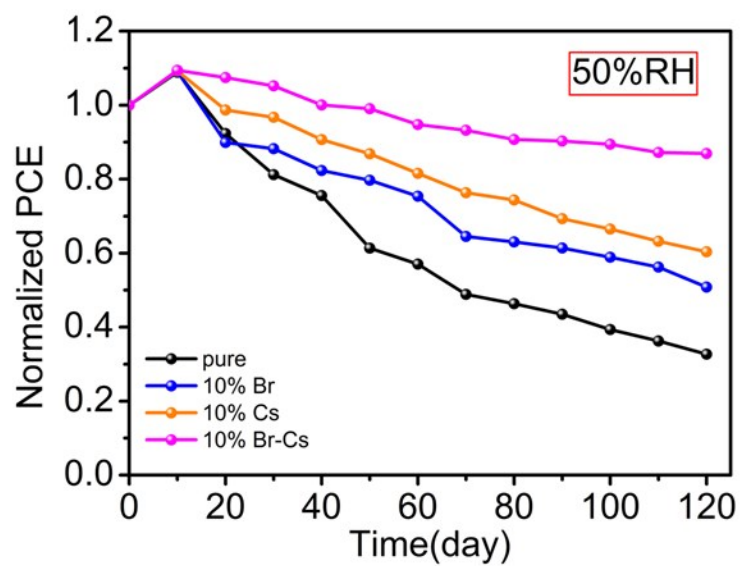

Fig. S4 Long-term stability of the FAPbI<sub>3</sub>-based PSCs devices under RH 50% condition.
